# Supplementary material for: Predicting potential ranges of primary malaria vectors and malaria in northern South America based on projected changes in climate, land cover and human population
Source: PubMed Central journal article supplement (PMC4546039; doi:10.1186/s13071-015-1033-9), 2015-08-20
Supplement: 13071_2015_1033_MOESM3_ESM.pdf [file 13071_2015_1033_MOESM3_ESM.pdf]

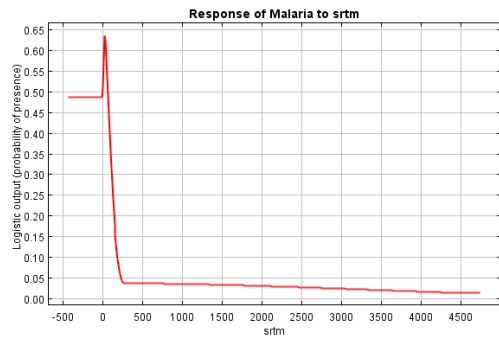

A

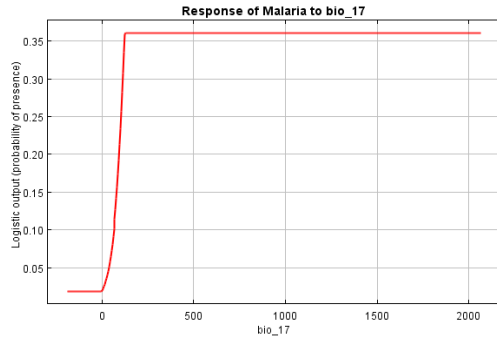

B

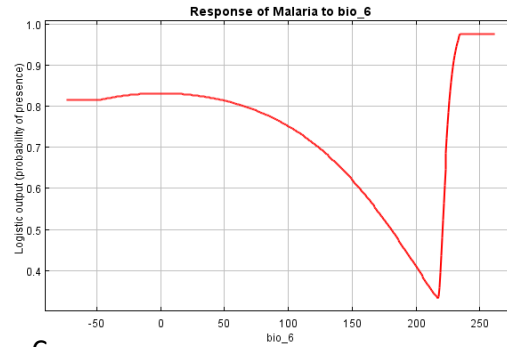

C

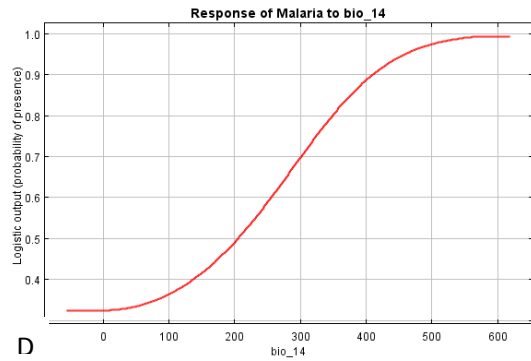

D

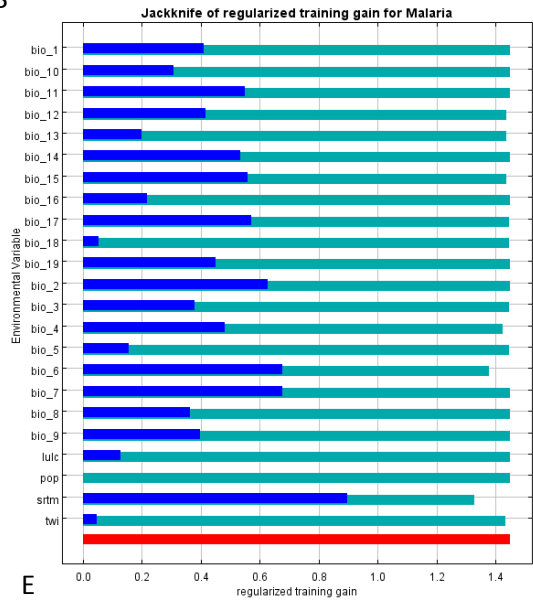

E
